# Supplementary material for: Natural selection at the RASGEF1C (GGC) repeat in human and divergent genotypes in late-onset neurocognitive disorder
Source: Sci Rep. 2021 Sep 28;11:19235. doi: 10.1038/s41598-021-98725-y (PMC8479062; doi:10.1038/s41598-021-98725-y)
Supplement: Supplementary file 1 — Supplementary Information 1. [file 41598_2021_98725_MOESM1_ESM.xlsx]

## Sheet: Sheet1
320	NCDs	6/8		6
322		8/11		8
319		6/6		6
314		6/6		6
317		7/9		7
315		6/6		6
313		6/6		6
312		6/6		6
311		6/6		6
308		6/6		6
495		6/6		6
318		6/6		6
321		6/6		6
338		6/6		6
346		6/11		6
69		6/6		6
371		6/6		6
161		6/6		6
159		6/6		6
41		6/6		6
535		6/6		6
524		6/6		6
551		6/9		6
512		6/6		6
279		6/6		6
215		6/6		6
8		6/6		6
93		6/7		6
179		6/6		6
209		6/6		6
12		6/8		6
90		6/11		6
133		6/6		6
404		6/8		6
248		6/7		6
378		6/6		6
429		6/6		6
96		6/6		6
100		6/8		6
106		6/6		6
119		7/8		7
127		6/8		6
75		6/6		6
158		6/7		6
177		6/6		6
181		8/11		8
6		6/6		6
39		5/6		5
57		6/6		6
62		6/6		6
71		6/8		6
77		6/6		6
81		6/6		6
86		6/9		6
88		6/8		6
194		6/6		6
206		8/8		8
207		6/6		6
217		6/6		6
232		6/6		6
253		6/6		6
327		6/6		6
415		6/6		6
411		6/9		6
396		6/8		6
391		6/6		6
379		8/8		8
352		6/6		6
358		6/6		6
349		6/7		6
339		6/6		6
335		6/6		6
332		6/6		6
368		6/6		6
365		6/6		6
330		8/8		8
329		8/8		8
324		6/6		6
323		6/6		6
108		6/9		6
138		6/6		6
140		8/8		8
142		6/8		6
151		6/8		6
154		6/6		6
299		6/6		6
292		6/8		6
290		7/7		7
289		8/8		8
281		6/11		6
280		6/6		6
155		6/6		6
260		6/6		6
258		6/6		6
257		6/6		6
277		6/6		6
236		5/6		5
86		6/9		6
327		6/6		6
307		6/6		6
405		6/6		6
68		6/6		6
98		6/8		6
306		6/6		6
326		6/6		6
316		6/8		6
328		6/6		6
298		6/6		6
295		6/7		6
305		6/6		6
276		6/6		6
347		6/6		6
414		6/6		6
575		6/6		6
284		6/6		6
				8
				11
				6
				6
				9
				6
				6
				6
				6
				6
				6
				6
				6
				6
				11
				6
				6
				6
				6
				6
				6
				6
				9
				6
				6
				6
				6
				7
				6
				6
				8
				11
				6
				8
				7
				6
				6
				6
				8
				6
				8
				8
				6
				7
				6
				11
				6
				6
				6
				6
				8
				6
				6
				9
				8
				6
				8
				6
				6
				6
				6
				6
				6
				9
				8
				6
				8
				6
				6
				7
				6
				6
				6
				6
				6
				8
				8
				6
				6
				9
				6
				8
				8
				8
				6
				6
				8
				7
				8
				11
				6
				6
				6
				6
				6
				6
				6
				9
				6
				6
				6
				6
				8
				6
				6
				8
				6
				6
				7
				6
				6
				6
				6
				6
				6
